# Supplementary material for: X-ray excited photoluminescence near the giant resonance in solid-solution Gd1−xTbxOCl nanocrystals and their retention upon solvothermal topotactic transformation to Gd1−xTbxF3
Source: Royal Society of Chemistry journal article supplement (doi:10.1039/c5nr07819a), 2015-12-02
Supplement: c5nr07819a1.pdf [file c5nr07819a1.pdf]

|                                                                                                  |           |           |           |           |           |           |           |
|--------------------------------------------------------------------------------------------------|-----------|-----------|-----------|-----------|-----------|-----------|-----------|
| Intended Tb <sup>3+</sup><br>Dopant<br>Concentration<br>in Gd <sub>1-x</sub> Tb <sub>x</sub> OCl | x = 0.020 | x = 0.050 | x = 0.100 | x = 0.150 | x = 0.200 | x = 0.250 | x = 0.300 |
| Actual Tb <sup>3+</sup><br>Dopant<br>Concentration<br>in Gd <sub>1-x</sub> Tb <sub>x</sub> OCl   | x = 0.018 | x = 0.042 | x = 0.084 | x = 0.131 | x = 0.171 | x = 0.216 | x = 0.234 |

**Table S1.** The top row shows the intended Tb<sup>3+</sup> dopant concentration for Gd<sub>1-x</sub>Tb<sub>x</sub>OCl, whereas the bottom row shows the actual dopant concentration as determined by inductively coupled plasma mass spectrometry.

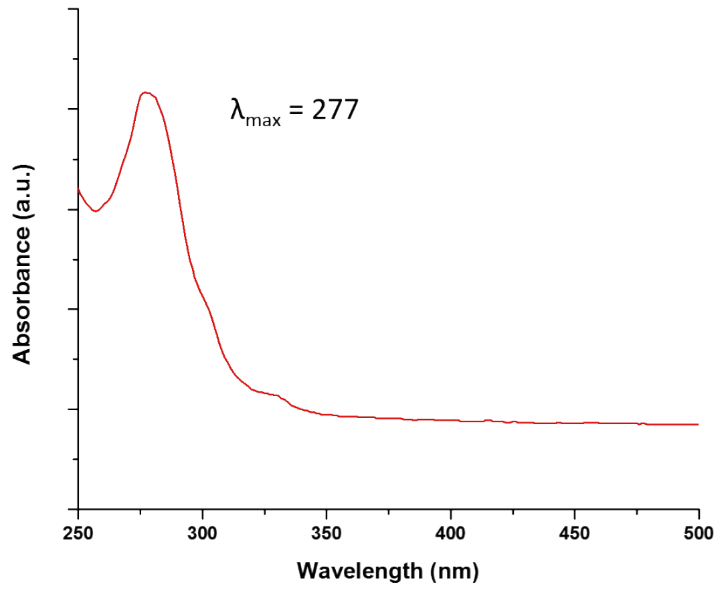

**Figure S1.** Optical absorption spectrum of  $\text{Gd}_{0.985}\text{Tb}_{0.015}\text{OCl}$  nanocrystals dispersed in hexanes.
